# Supplementary material for: Accelerated 19 F biomolecular magic-angle spinning NMR with paramagnetic dopants
Source: Copernicus journal article supplement (doi:10.5194/mr-2026-3), 2026-02-24

Estimation of correlation time and effective distance for Gd(DTPA-BMA), for each of the four Trp sites in TET2.

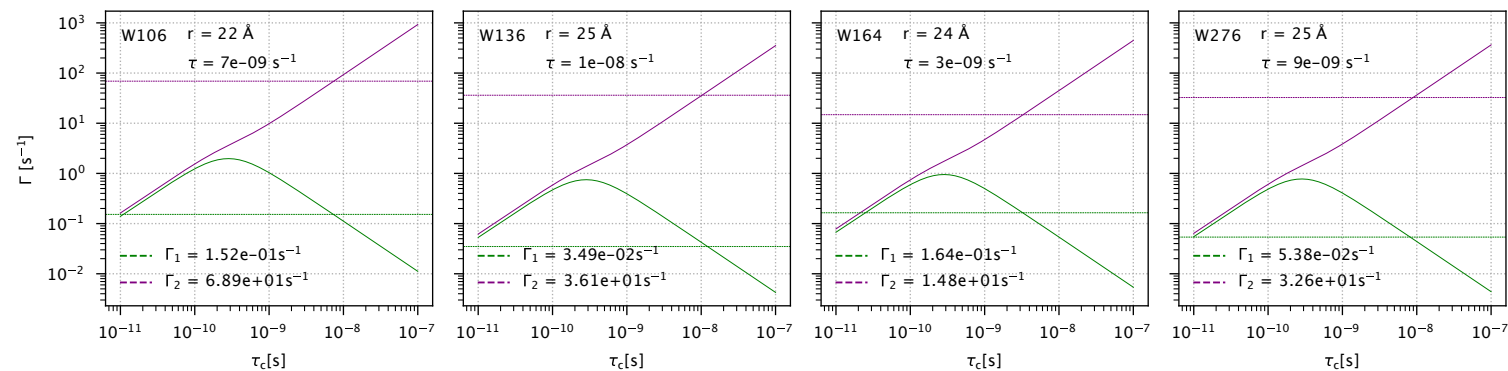

Same analysis for the data with Gd(DTPA)

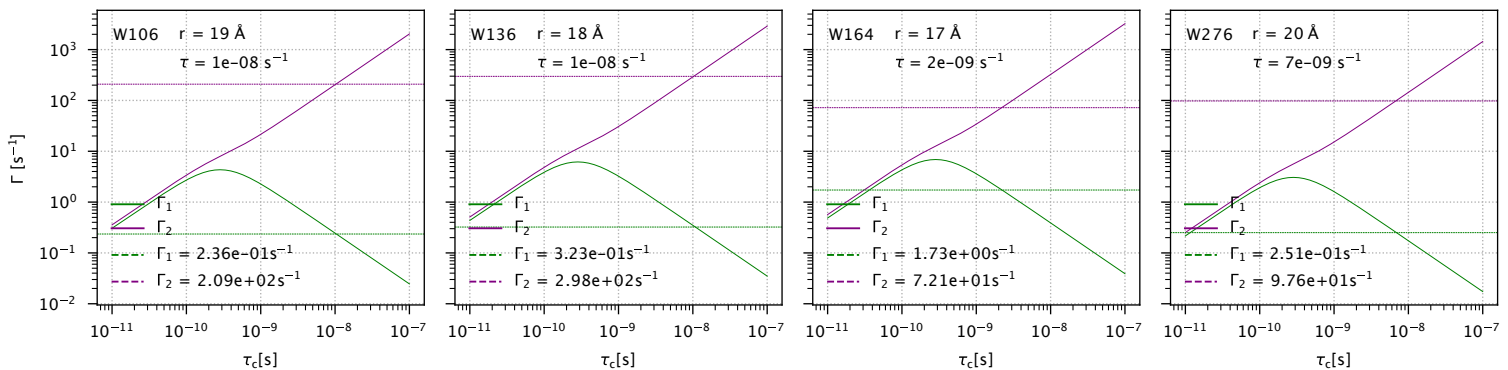

Calculations of the induced relaxation for a fixed correlation time and a range of distances.

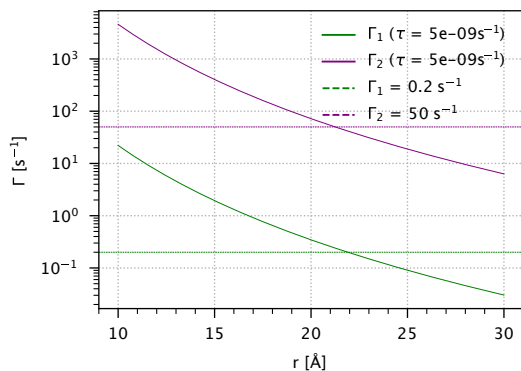

Supplement: Supplementary file [file mr-2026-3-AC1-supplement.pdf]
